# Supplementary material for: Biological monitoring of arsenic pollution based on whole blood arsenic atomic absorption assessment with in situ hydride trapping
Source: Royal Society of Chemistry journal article supplement (doi:10.1039/c4ja00130c), 2014-01-01
Supplement: c4ja00130c1.pdf [file c4ja00130c1.pdf]

## ELECTRONIC SUPPLEMENTARY INFORMATION (ESI) FOR JOURNAL OF ANALYTICAL ATOMIC SPECTROMETRY

Natalya B. Ivanenko, Nikolay D. Solovyev, Anatoly A. Ivanenko and  
Denis V. Navolotskii

Biological monitoring of arsenic pollution based on whole blood arsenic atomic absorption  
assessment with *in situ* hydride trapping

### Absorbance profiles for different surface coatings

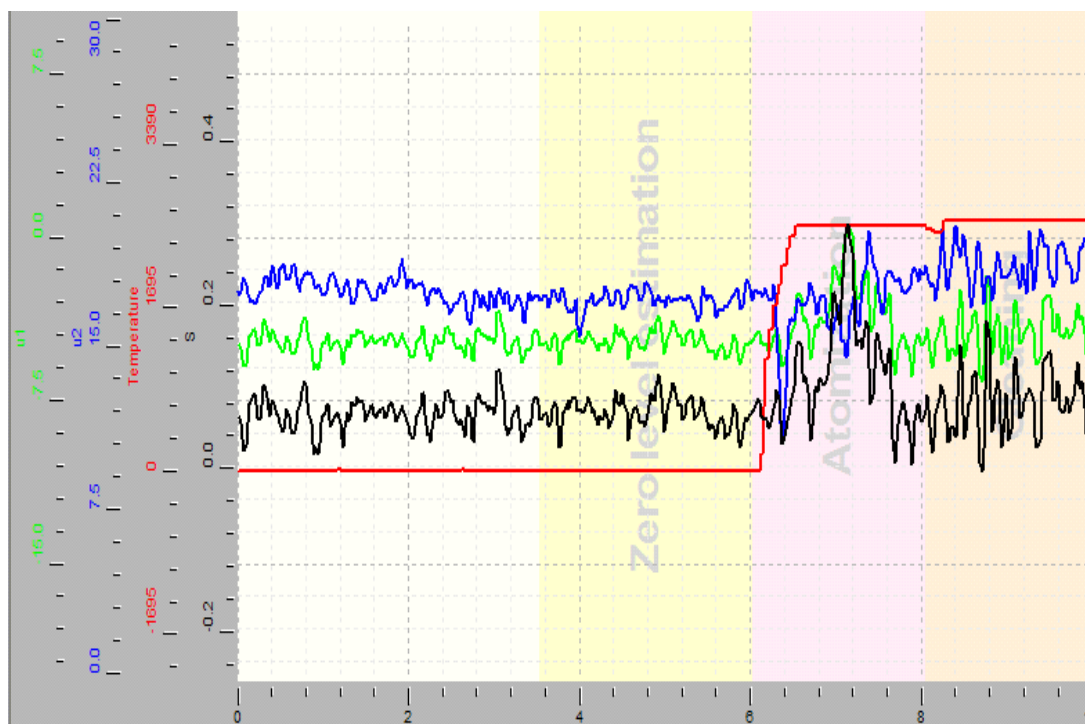

a)

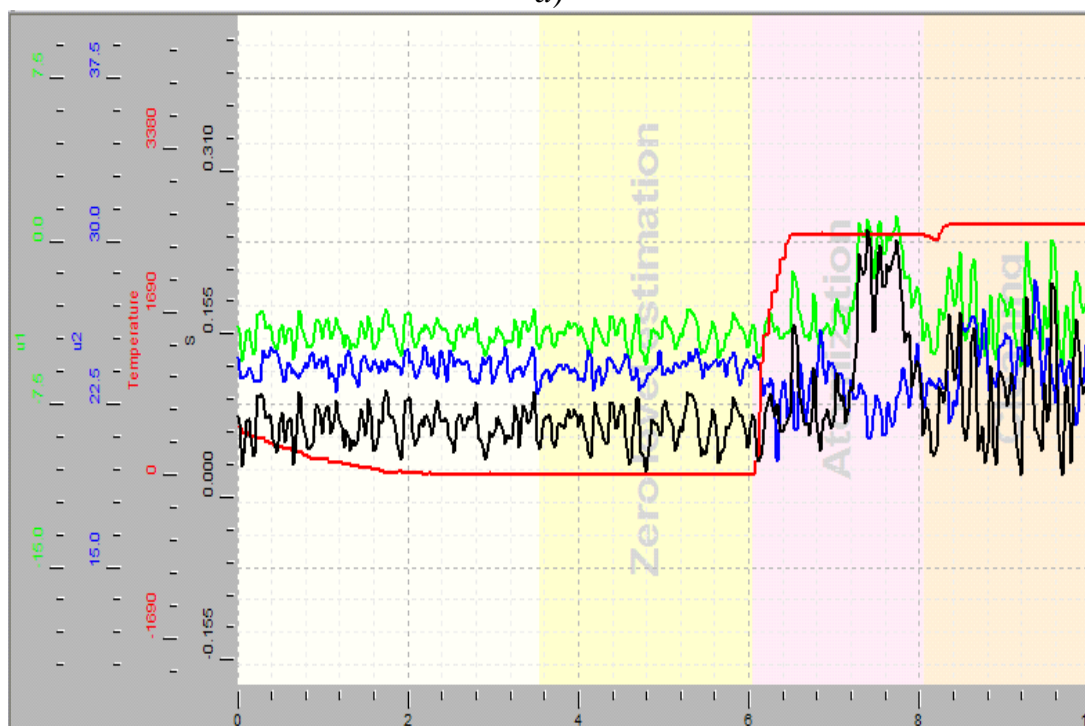

b)

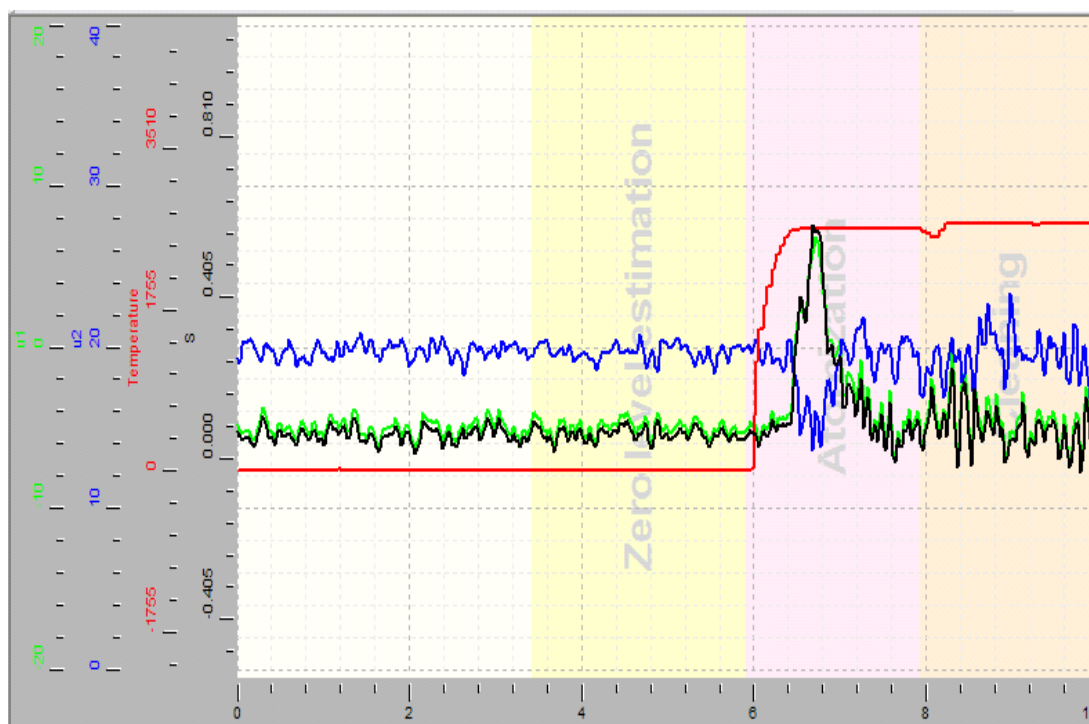

c)

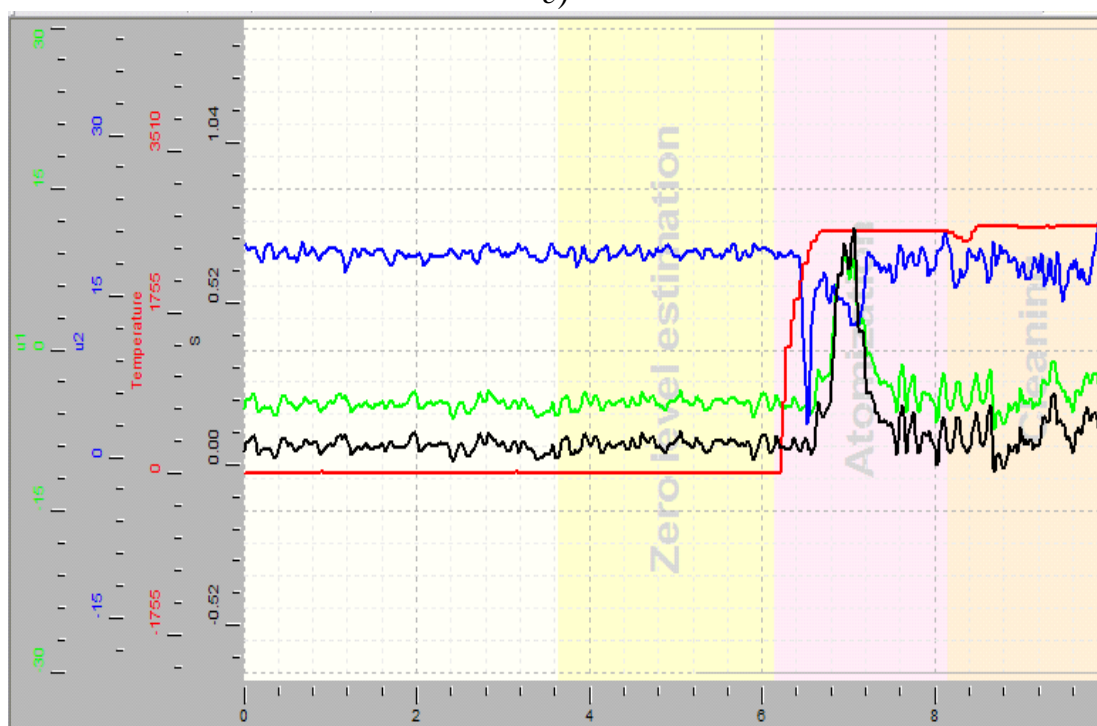

d)

**Fig. 1** Absorbance profiles for individual modifiers for 1000 pg arsenic after *in situ* trapping of  $\text{AsH}_3$ . Analytical signals were measured under optimized conditions of both arsenic reduction and absorbance registration. The data are presented as native print-screens from atomic absorption instrument software. Modifiers: *a*) unmodified furnace; *b*)  $\text{Na}_2\text{WO}_4$  (W); *c*)  $\text{Pd}(\text{NO}_3)_2$  (Pd); *d*)  $\text{H}_2\text{PtCl}_6$  (Pt). Designations (all in relative units): black – corrected absorbance (analytical signal); blue – registered intensity of absorbance line 193.7 nm; red – temperature; green – selective absorbance (for more details on analytical signals in Zeeman modulation polarization spectrometry see S.E. Sholupov and A.A. Ganeyev, *Spectrochim. Acta B*, 1995, **50**, 1227-1236)

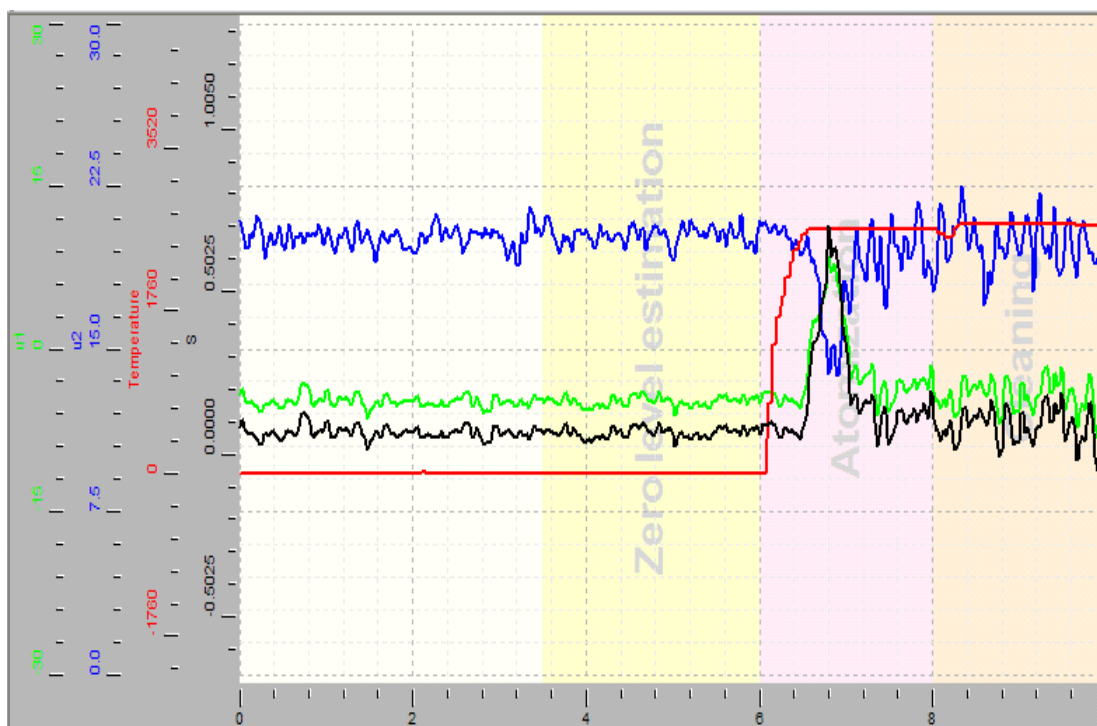

a)

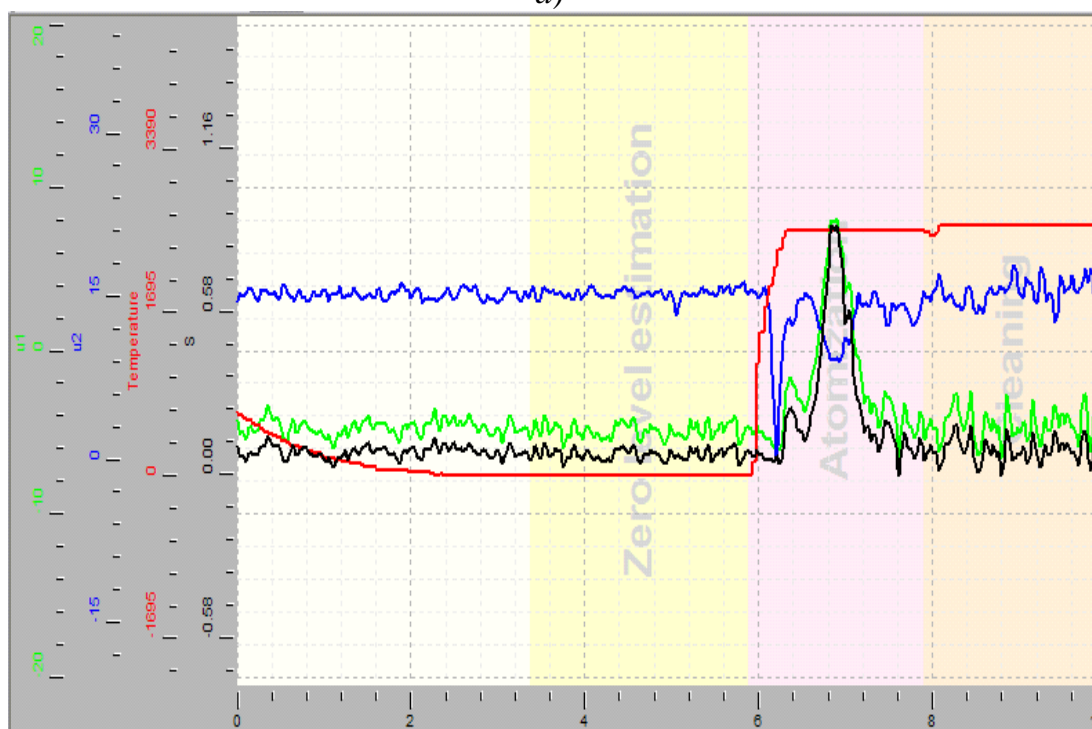

b)

**Fig. 2** Absorbance profiles for double layer modifiers for 1000 pg arsenic after *in situ* trapping of  $\text{AsH}_3$ . Analytical signals were measured under optimized conditions of both arsenic reduction and absorbance registration. The data are presented as native print-screens from atomic absorption instrument software. Modifiers: a)  $\text{Na}_2\text{WO}_4 - \text{Pd}(\text{NO}_3)_2$  (W-Pd); b)  $\text{Na}_2\text{WO}_4 - \text{H}_2\text{PtCl}_6$  (W-Pt). Designations are the same as in Fig. 1
